# Supplementary material for: Holocene surface rupturing earthquakes on the Dinaric Fault System,western Slovenia
Source: Copernicus journal article supplement (doi:10.5194/se-2021-7), 2021-02-05
Supplement: Supplementary file 1 [file Supplement to Grützner et al.docx]

This supplement contains the six high-resolution orthophotos of the trench wall described in the paper. We constructed the orthophotos from overlapping photographs (camera: Nikon D70). We used the Agisoft Metashape software to produce a 3D-model of each single trench wall with the Structure-from-Motion technique. The intersections of the 1 m grid lines were selected as reference points. We then computed the orthophotos from the model-derived DEM and the source images. In all orthophotos, the grid lines in the trench have 1 m spacing for scale.


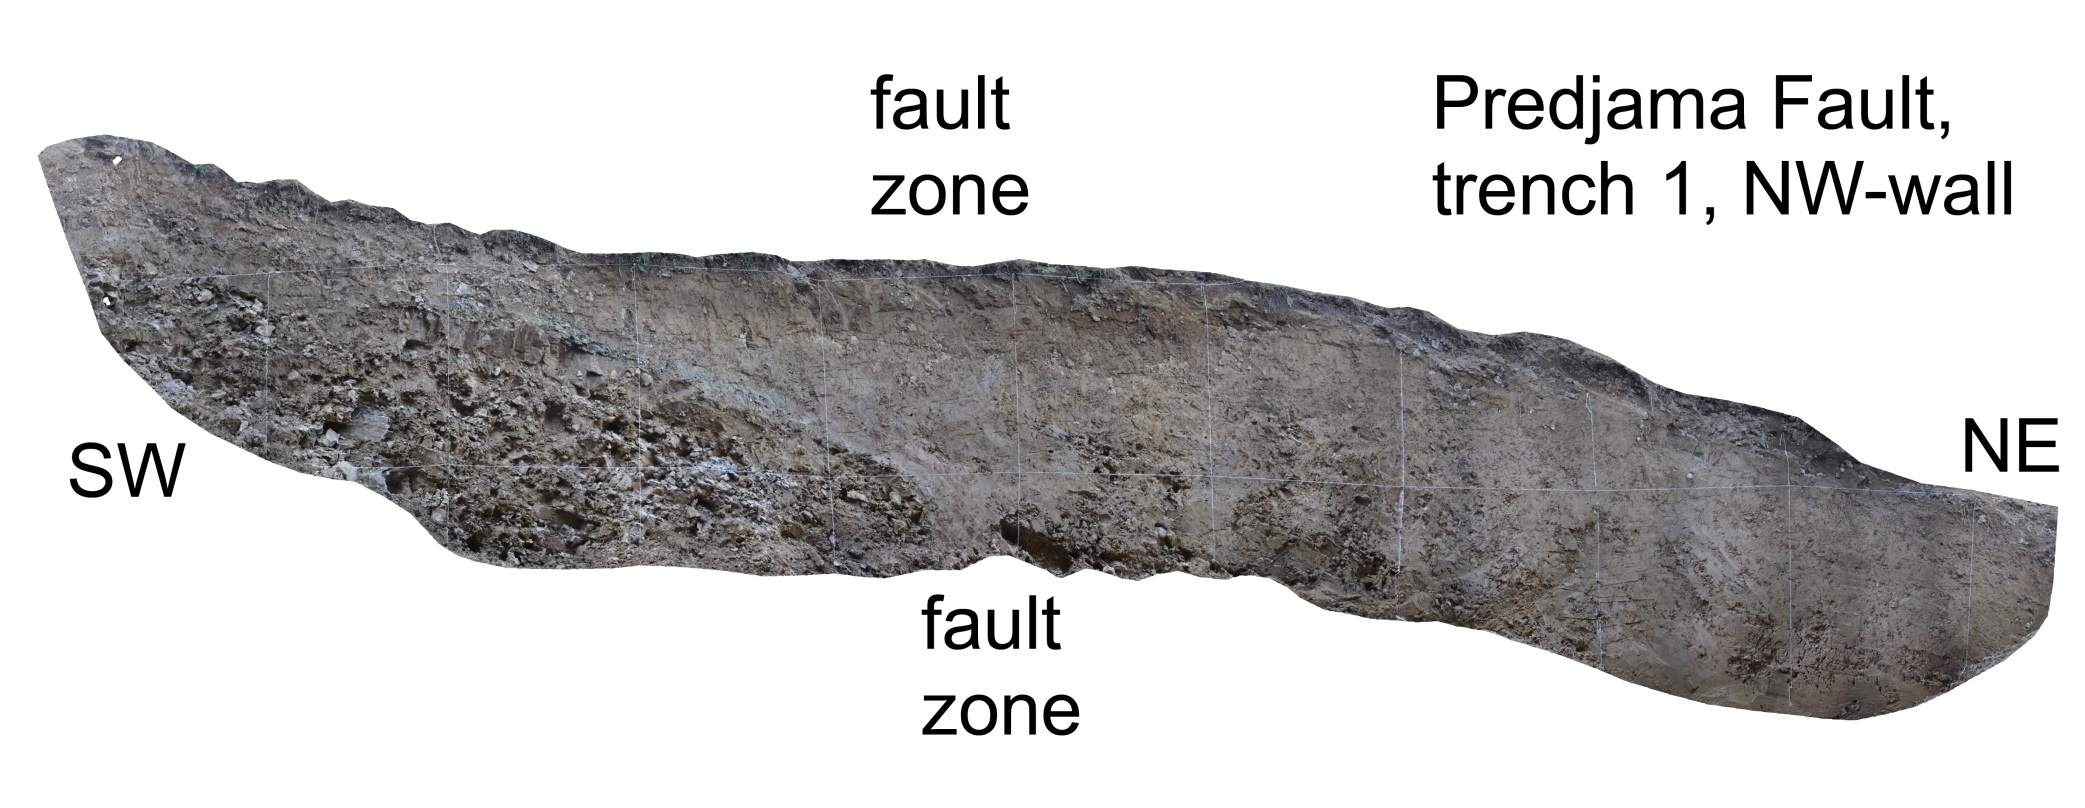


**S1: Orthophoto of the NW-wall of trench 1 across the Predjama Fault.**


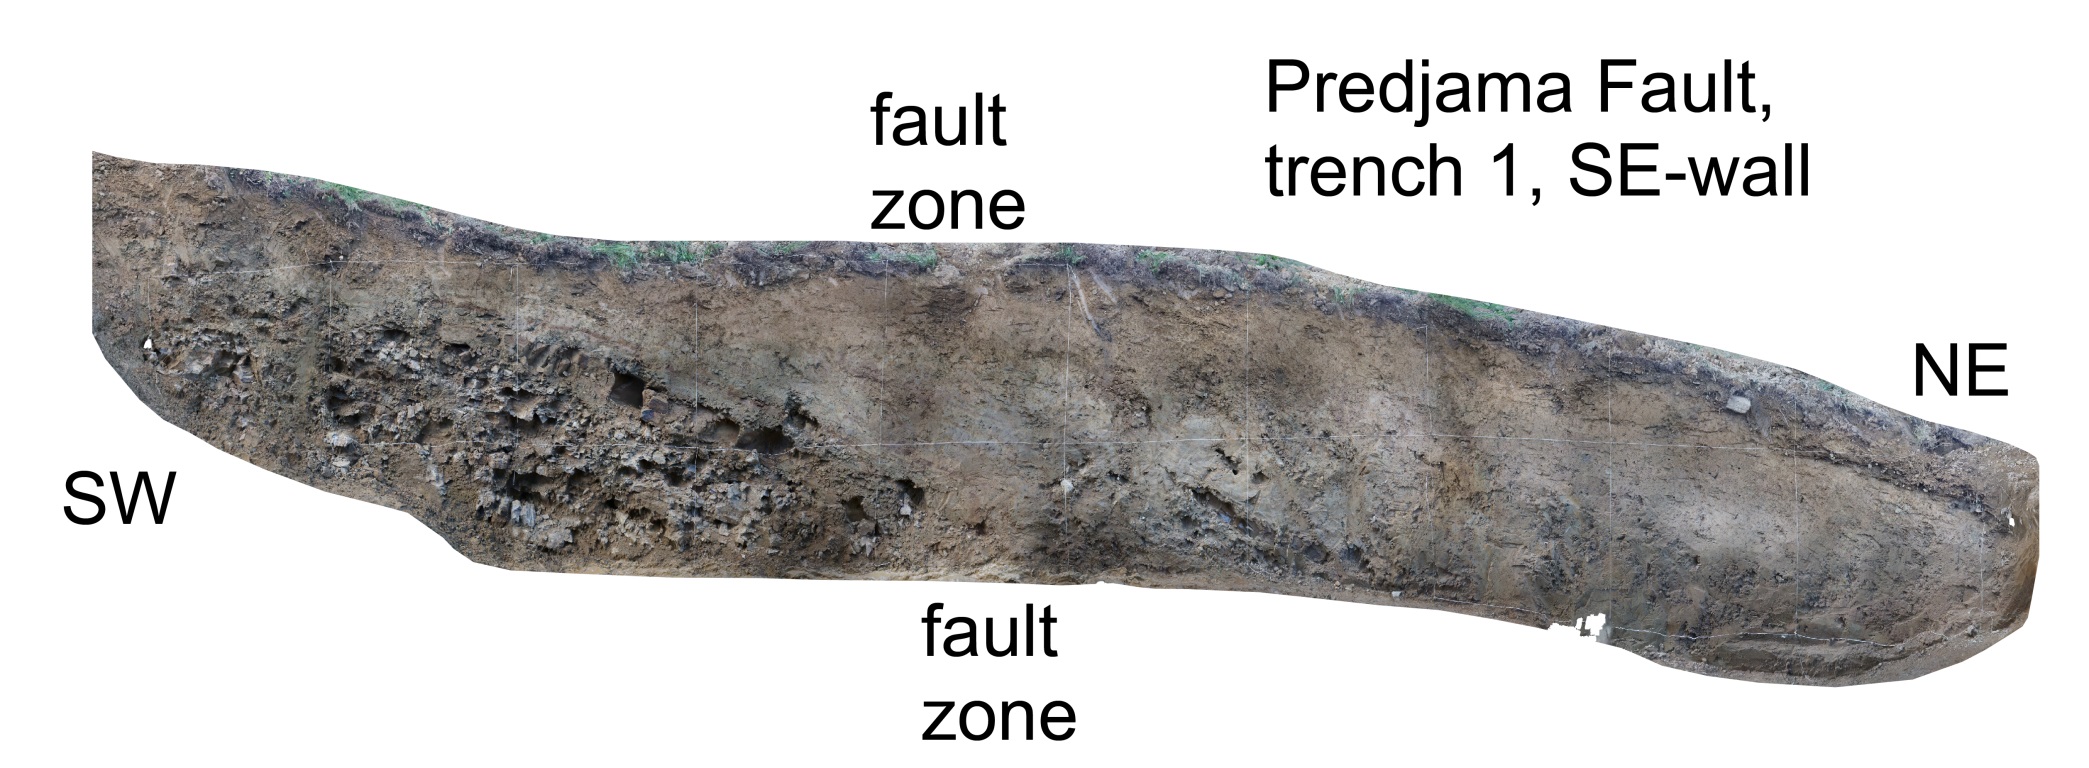


**S2: Orthophoto of the SE-wall of trench 1 across the Predjama Fault.**

**
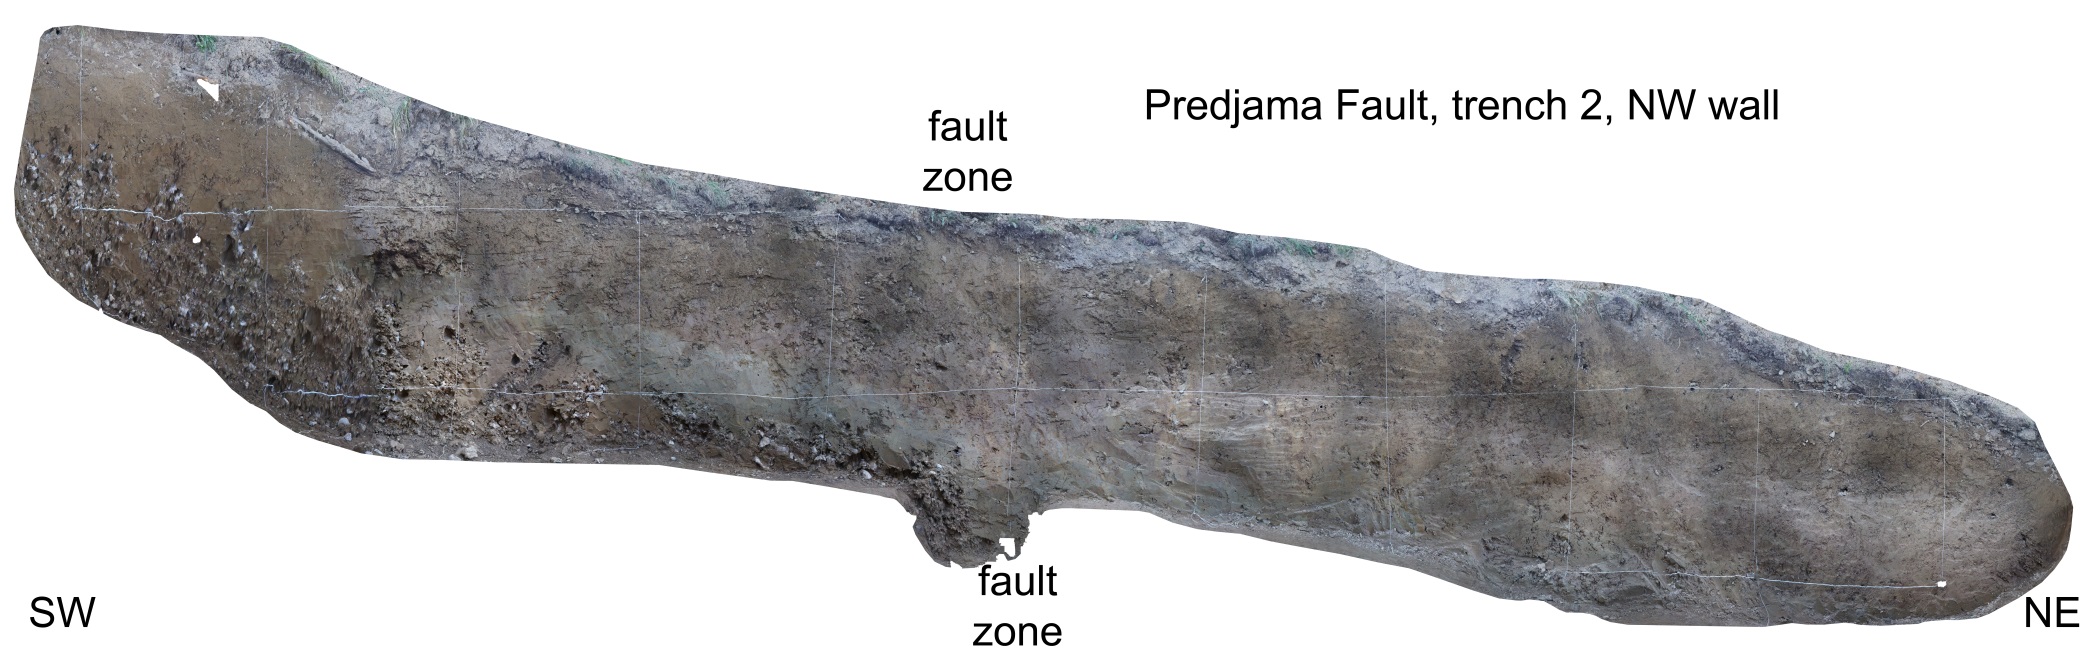
**

**S3: Orthophoto of the NW-wall of trench 2 across the Predjama Fault.**

**
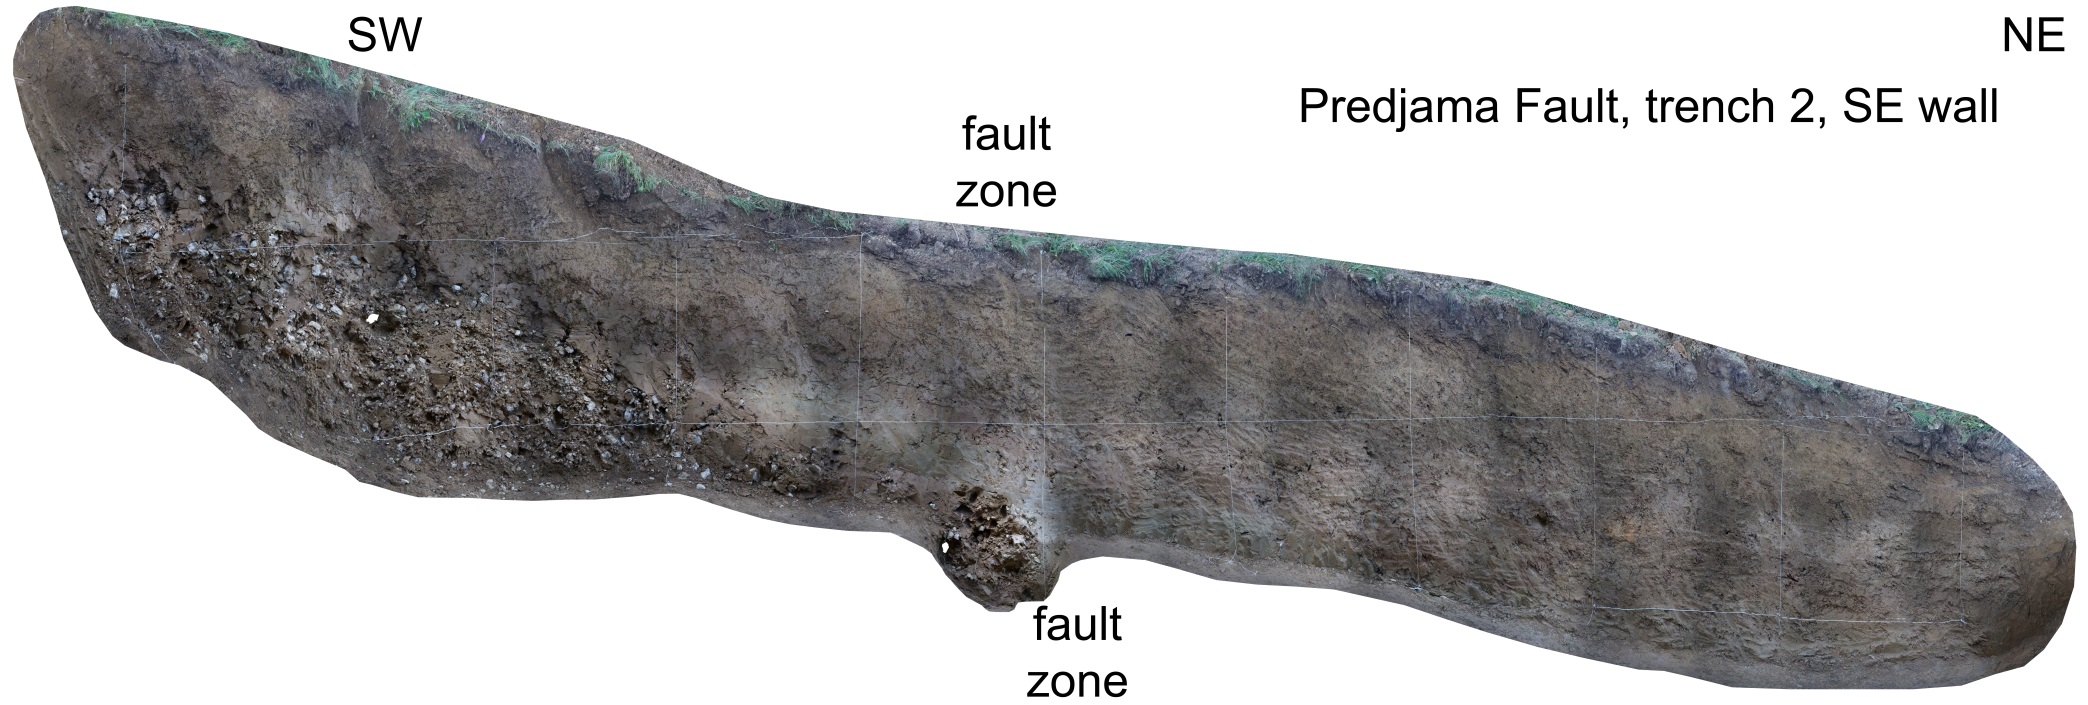
**

**S4: Orthophoto of the SE-wall of trench 2 across the Predjama Fault.**

**
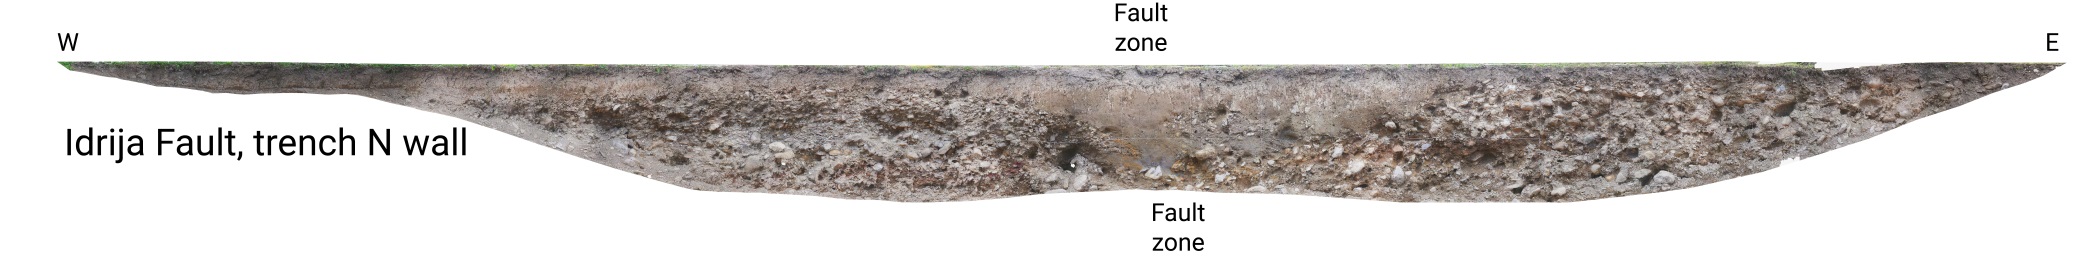
**

**S5: Orthophoto of the N-wall of the trench across the Idrija Fault.**

**
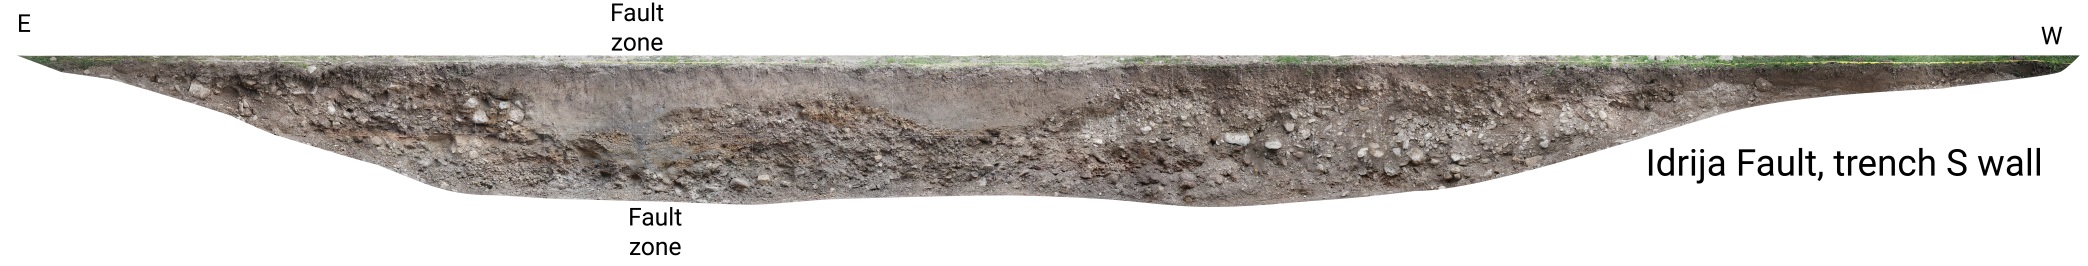
**

**S6: Orthophoto of the S-wall of the trench across the Idrija Fault.**
